# Supplementary material for: Involvement of G-triplex and G-hairpin in the multi-pathway folding of human telomeric G-quadruplex
Source: PubMed Central journal article supplement — Nucleic Acids Res. 2017 Aug 29;45(19):11401–12. doi: 10.1093/nar/gkx766 (PMC5737514; doi:10.1093/nar/gkx766), 2017-08-29
Supplement: gkx766_supp.pdf [file gkx766_supp.pdf]

## Supplementary materials

### Involvement of G-triplex and G-hairpin in the multi-pathway folding of human telomeric G-quadruplex

**Xi-Miao Hou<sup>1,§,\*</sup>, Yi-Ben Fu<sup>2,§</sup>, Wen-Qiang Wu<sup>1</sup>, Lei Wang<sup>1</sup>, Fang-Yuan Teng<sup>1</sup>, Ping Xie<sup>2</sup>,  
Peng-Ye Wang<sup>2</sup> and Xu-Guang Xi<sup>1,3,\*</sup>**

<sup>1</sup>College of Life Sciences, Northwest A&F University, Yangling, Shaanxi 712100, China;

<sup>2</sup>Beijing National Laboratory for Condensed Matter Physics and CAS Key Laboratory of Soft Matter Physics, Institute of Physics, Chinese Academy of Sciences, Beijing 100190, China;

<sup>3</sup>Laboratoire de Biologie et Pharmacologie Appliquée, Ecole Normale Supérieure de Cachan, Centre National de la Recherche Scientifique, 61 Avenue du Président Wilson, 94235 Cachan, France

\*To whom correspondence should be addressed. Tel: +86 29 8708 1664; Fax: +86 29 8708 1664; Email: [houximiao@nwsuaf.edu.cn](mailto:houximiao@nwsuaf.edu.cn)

Correspondence may also be addressed to Xu-Guang Xi. Tel: +33 1 4740 7754; Fax: +33 1 4740 7754; Email: [xxi01@ens-cachan.fr](mailto:xxi01@ens-cachan.fr)

§Xi-Miao Hou and Yi-Ben Fu contributed equally to this work.

**Supplementary Table S1. Sequences of substrates used in the experiments.**

| <b>Substrates for single-molecule FRET (5'-3')</b> |                                                                             |
|----------------------------------------------------|-----------------------------------------------------------------------------|
| <b>G4 at the 3' end of duplex DNA</b>              |                                                                             |
| dG4                                                | GCGTGGCACCGGTAATAGGAAATAGGAGAGGGGTTAGGGTTAGGGTTAGGG<br>(Cy3)                |
| dG3                                                | GCGTGGCACCGGTAATAGGAAATAGGAGAGGGGTTAGGGTTAGGGTTTTTT<br>(Cy3)                |
| dG3*                                               | GCGTGGCACCGGTAATAGGAAATAGGAGATTTTTTTGGGTTAGGGTTAGGG<br>(Cy3)                |
| dG2                                                | GCGTGGCACCGGTAATAGGAAATAGGAGATTTTTTTTTTTTTGGGTTAGGG<br>(Cy3)                |
| d4G2                                               | GCGTGGCACCGGTAATAGGAAATAGGAGATTTTTTTTTTTTTGGGGTTAGGG<br>G(Cy3)              |
| stem                                               | TCTCCT(iCy5)ATTCCTATTACCGGTGCCACGC-biotin                                   |
| <b>Poly T at the 3' end of duplex DNA</b>          |                                                                             |
| dT <sub>20</sub>                                   | GCGTGGCACCGGTAATAGGAAATAGGAGATTTTTTTTTTTTTTTTTTTTT<br>(Cy3)                 |
| stem                                               | TCTCCT(iCy5)ATTCCTATTACCGGTGCCACGC-biotin                                   |
| <b>G4 at 5' end of duplex DNA</b>                  |                                                                             |
| G4d                                                | (Cy3)GGGTTAGGGTTAGGGTTAGGGATGTATGACAAGGAAGG                                 |
| G3d                                                | (Cy3)GGGTTAGGGTTAGGGTTTTTTATGTATGACAAGGAAGG                                 |
| G2d                                                | (Cy3)GGGTTAGGGTTTTTTTTTTTTATGTATGACAAGGAAGG                                 |
| stem                                               | biotin-CCTTCCTTGTCAT(iCy5)ACAT                                              |
| <b>G4 at 3' end of partial duplex DNA</b>          |                                                                             |
| dsG4                                               | GCGTGGCACCGGTAATAGGAAATAGGAGAT <sub>12</sub> GGGTTAGGGTTAGGGTTAG<br>GG(Cy3) |
| stem                                               | (Cy5)TCTCCTATTCCTATTACCGGTGCCACGC-biotin                                    |
| <b>G4 at 5' end of partial duplex DNA</b>          |                                                                             |
| G4sd                                               | (Cy3)GGGTTAGGGTTAGGGTTAGGGT <sub>12</sub> ATGTATGACAAGGAAGG                 |
| stem                                               | biotin-CCTTCCTTGTCATACAT(Cy5)                                               |
| <b>Substrates for CD measurement (5'-3')</b>       |                                                                             |
| 3G4                                                | GGGTTAGGGTTAGGGTTAGGG                                                       |
| 3G3                                                | GGGTTAGGGTTAGGG                                                             |
| 3G2                                                | GGGTTAGGG                                                                   |
| S <sub>12</sub>                                    | CTCTGCTCGACG                                                                |
| <b>Substrates for gel assay</b>                    |                                                                             |
| T <sub>12</sub> -FAM                               | TTTTTTTTTTTT(FAM)                                                           |
| 3G2                                                | GGGTTAGGG                                                                   |
| 4G2                                                | GGGGTTAGGGG                                                                 |
| S <sub>12</sub> S <sub>6</sub> -FAM                | CGTCGAGCAGAGTTTTTT(FAM)                                                     |
| S <sub>12</sub>                                    | CTCTGCTCGACG                                                                |

**Supplementary Table S2. Dye parameters**

| Dye | Radius1 (Å) | Radius2 (Å) | Radius3 (Å) | Linker length (Å) | Linker width (Å) |
|-----|-------------|-------------|-------------|-------------------|------------------|
| Cy3 | 6.8         | 3.0         | 1.5         | 20                | 4.5              |
| Cy5 | 11          | 3.0         | 1.5         | 22                | 4.5              |

**Supplementary Table S3. The interconversion rate between different states (sec).**

|     | buffer | G4-G3 | G3-G4 | G4-G2 | G2-G4 | G3-G2 | G2-G3 | G2-ssDNA | ssDNA-G2 |
|-----|--------|-------|-------|-------|-------|-------|-------|----------|----------|
| dG4 | NaCl   | 4.53  | 12.59 | 3.77  | 2.52  | 7.00  | 1.52  | 1.55     | 8.16     |
| dG4 | KCl    | 13.32 | 17.24 | 15.54 | 2.38  | 9.30  | 3.60  | 1.86     | 4.57     |
| dG3 | NaCl   |       |       |       |       | 13.29 | 16.1  | 15.90    | 11.98    |
| dG3 | KCl    |       |       |       |       | 15.16 | 18.58 | 17.68    | 11.08    |
| dG2 | NaCl   |       |       |       |       |       |       | 15.17    | 7.43     |
| dG2 | KCl    |       |       |       |       |       |       | 22.44    | 8.08     |

G3, G2 denote G-triplex and G-hairpin respectively. The time was obtained from dG4, dG3 and dG2 traces in 100 mM NaCl or KCl showing dynamic transitions.

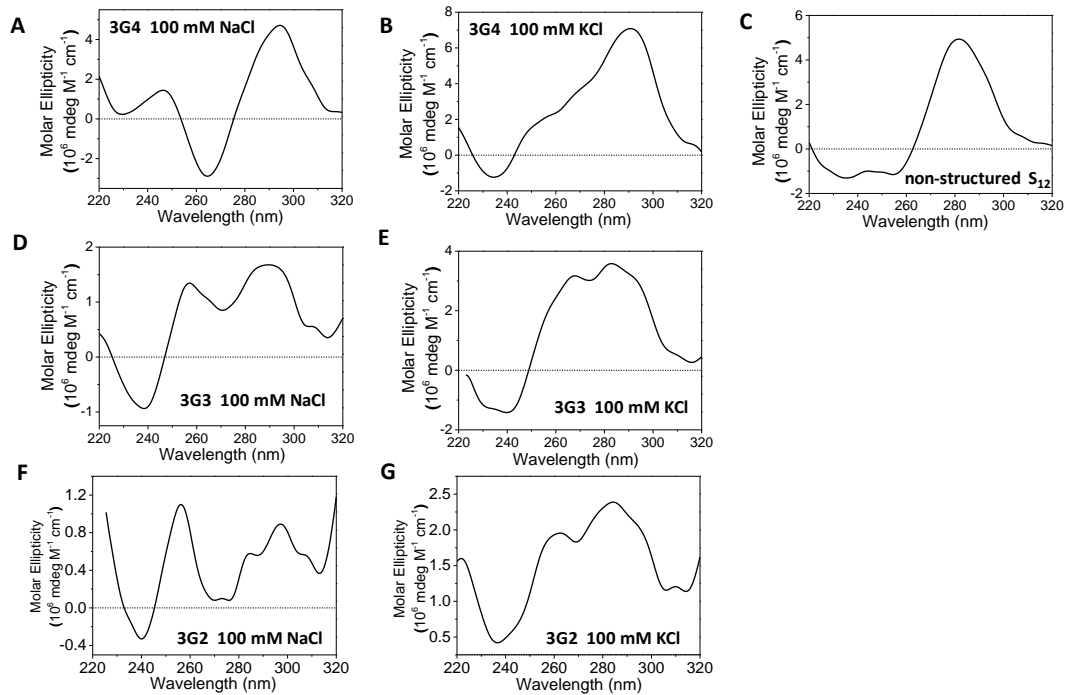

**Supplementary Figure S1. CD spectrum.** All DNA concentrations were 2  $\mu\text{M}$ . **(A)** In 100 mM NaCl, CD spectrum of 3G4 has one positive peak at  $\sim 295$  nm and one negative peak at  $\sim 265$  nm. **(B)** In 100 mM KCl, CD spectrum of 3G4 has one dominant positive peak at  $\sim 290$  nm. **(C)** For the non-structured ssDNA, in 100 mM KCl, CD spectrum has one peak at  $\sim 280$  nm. **(D)** In 100 mM NaCl, CD spectrum of 3G3 has two major positive peaks at  $\sim 255$  nm and 290 nm. **(E)** In 100 mM KCl, CD spectrum of 3G3 has two major positive peaks at  $\sim 265$  nm and 285 nm. **(F)** In 100 mM NaCl, CD spectrum of 3G2 has two major positive peaks at  $\sim 255$  and 295 nm, and two minor peaks at  $\sim 280$  nm and 310 nm. **(G)** In 100 mM KCl, CD spectrum of 3G2 has two major positive peaks at  $\sim 260$  nm and 285 nm.

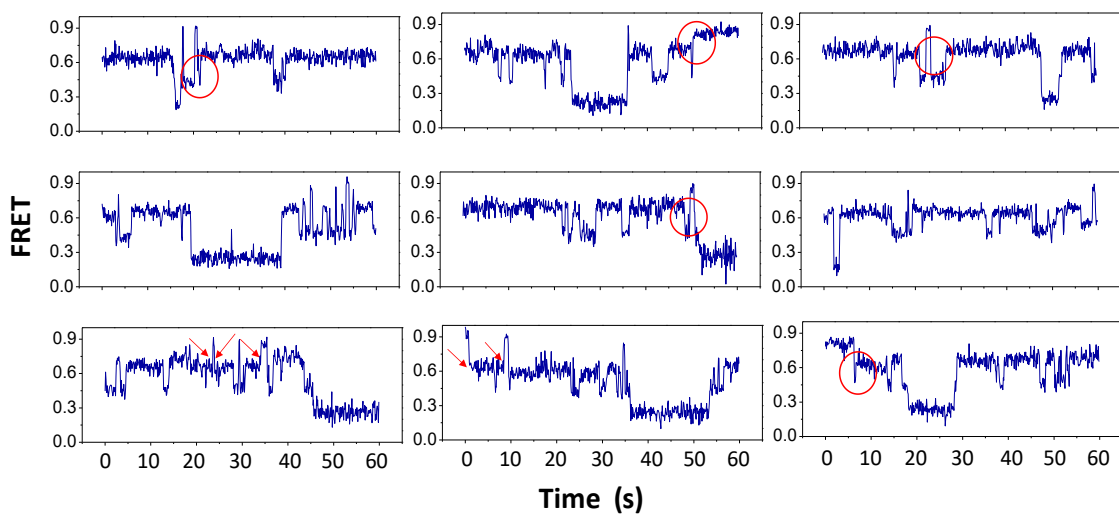

**Supplementary Figure S2. Selected smFRET traces of dG4 in 100 mM NaCl showing 4 states.** Representative direct transitions between  $E_{0.9}$ - $E_{0.7}$  are marked by red arrows, and indirect transitions are marked by red circles.

**A dG4 in 100 mM NaCl**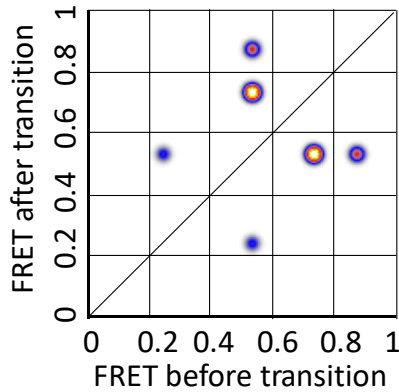**B dG3 in 100 mM NaCl**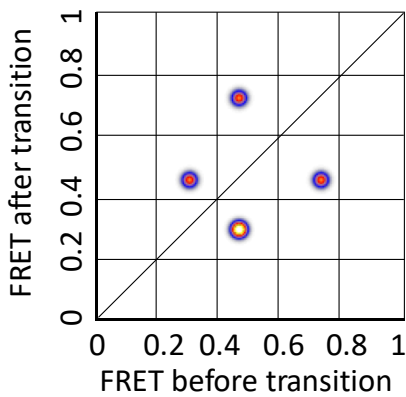**C dG3 in 100 mM KCl**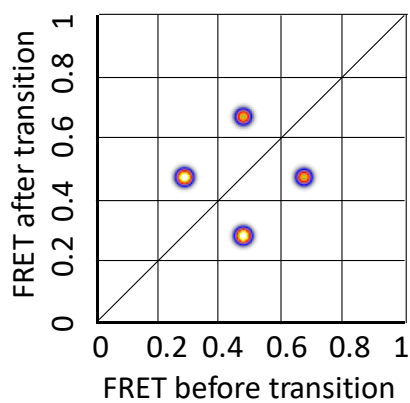**D dG2 in 100 mM NaCl**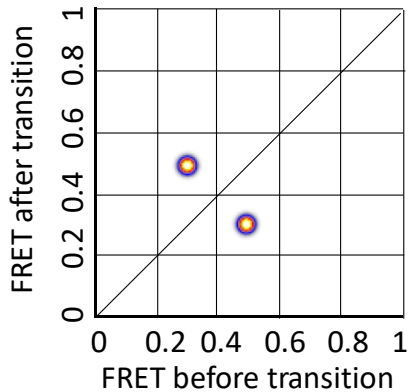**E dG2 in 100 mM KCl**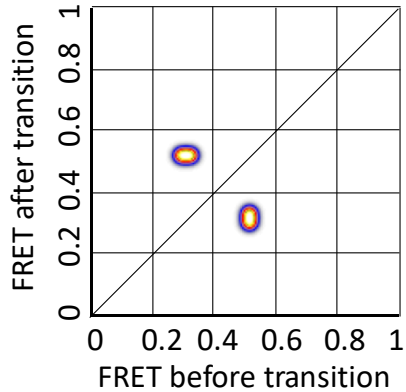

**Supplementary Figure S3. Transition density plots for dG4, dG3 and dG2 in 100 mM NaCl or KCl.** The color intensity corresponds to transition probability. The x-axis is the initial FRET prior to transition, and the y-axis is the final FRET after transition. **(A)** For dG4 in 100 mM NaCl, the most frequent transitions are between  $E_{0.7}$ - $E_{0.5}$ , transitions between  $E_{0.9}$ - $E_{0.5}$  are less frequent. There are also a small amount of transitions between  $E_{0.5}$ - $E_{0.3}$ . **(B-C)** For dG3 in 100 mM NaCl or 100 mM KCl, the most frequent transitions are between  $E_{0.5}$ - $E_{0.3}$ , transitions between  $E_{0.5}$ - $E_{0.7}$  are less frequent. **(D-E)** For dG2 in 100 mM NaCl or 100 mM KCl, the transitions are between  $E_{0.5}$ - $E_{0.3}$ . Transition density plot for dG4 in 100 mM KCl was not shown because the fraction of traces showing dynamic transitions is very low.

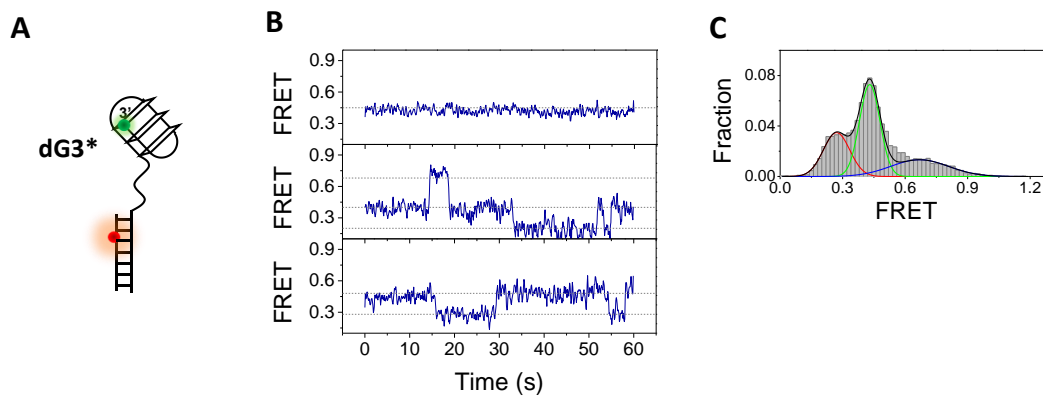

**Supplementary Figure S4. Conformational dynamics of G-triplex at the 3' end of ss/dsDNA.**

(A) Design of dG3\* substrate. (B) Representative traces of dG3\* in 100 mM NaCl. (C) FRET histograms of dG3\* in 100 mM NaCl. Multi-peak Gaussian distributions were used to fit the histograms.

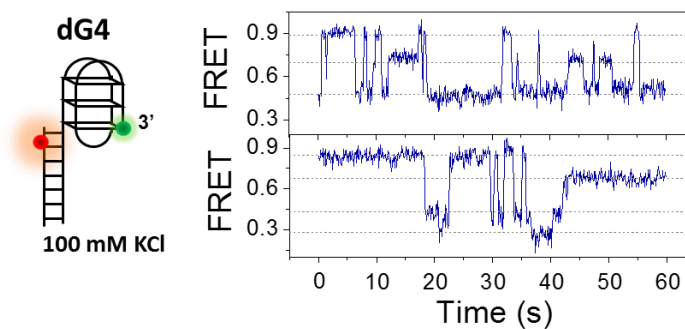

**Supplementary Figure S5. In 100 mM KCl, transitions between 3-4 states can be occasionally observed for dG4.**

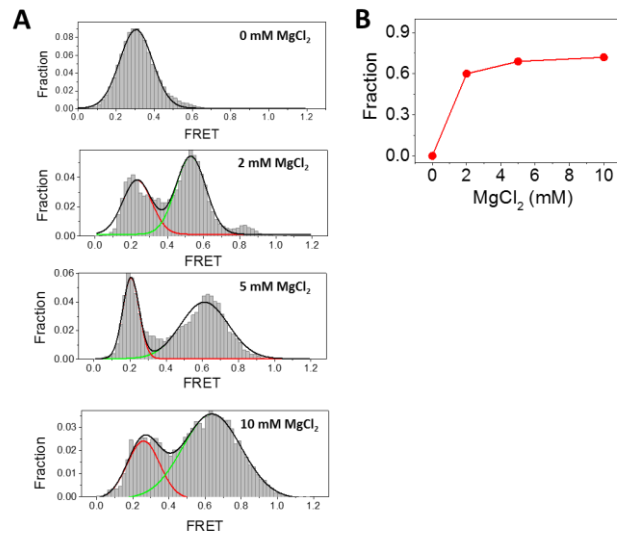

**Supplementary Figure S6. Effects of MgCl<sub>2</sub> on the folding of G-hairpin.** (A) FRET distributions of dG2 in 0-10 mM MgCl<sub>2</sub>. Single-peak and two-peak Gaussian distributions were used to fit those histograms. (B) Fractions of G-hairpin in different concentrations of MgCl<sub>2</sub>.

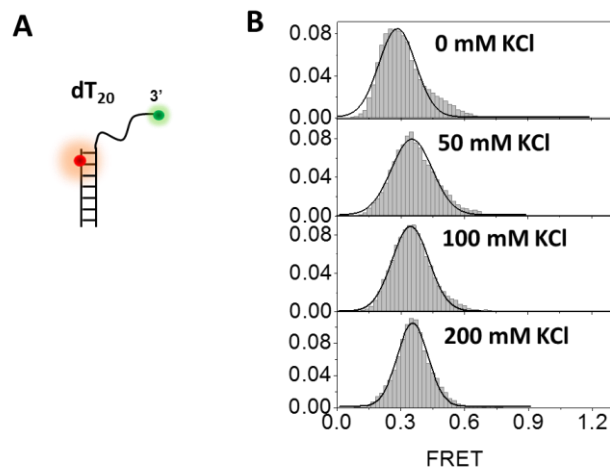

**Supplementary Figure S7. Poly-T sequence in different concentration of KCl.** (A) Schematic representation of experimental design for dT<sub>20</sub>. (B) FRET distributions of dT<sub>20</sub> in 0, 50, 100 and 200 mM KCl respectively. With the increasing of KCl concentration, there is no additional band at higher FRET value, suggesting no higher order structure has been formed.

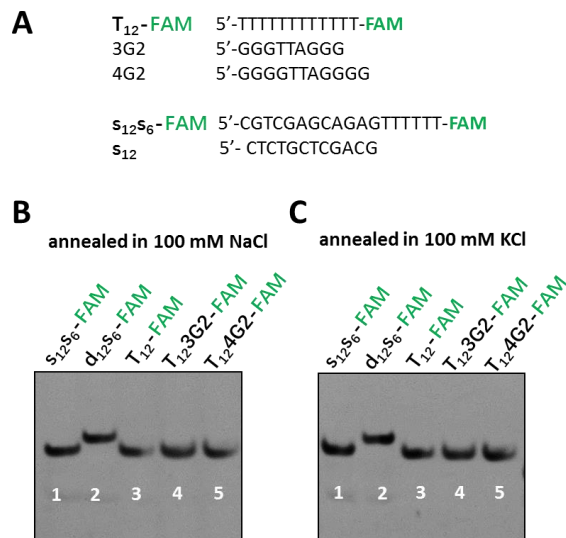

**Supplementary Figure S8. In dG2 construct, there are no stable base pairs between the poly-T linker and G-rich part. (A)** DNA sequences used in the gel assay. Poly-T sequence is labeled by FAM at 3' end for visualization. If poly-T and G-rich sequences can form stable base pairs, T<sub>12</sub>3G2-FAM and T<sub>12</sub>4G2-FAM (the annealed products of T<sub>12</sub>-FAM and 3G2 or 4G2) will migrate slower in native PAGE gel. Difference between s<sub>12</sub>s<sub>6</sub>-FAM and d<sub>12</sub>s<sub>6</sub>-FAM (the annealed products of s<sub>12</sub>s<sub>6</sub>-FAM and s<sub>12</sub>) is a positive control to show the reliability of gel analysis.

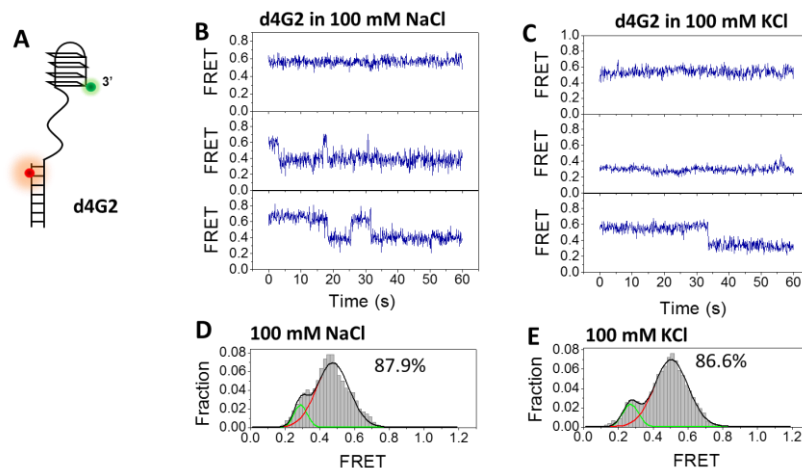

**Supplementary Figure S9. G-hairpin with longer G-rich sequence at the 3' end of ss/dsDNA in the presence of 100 mM NaCl or KCl. (A)** Design of d4G2 substrate. **(B-C)** In 100 mM NaCl or 100 mM KCl, d4G2 is either keeping static or going through dynamic transitions between two FRET states at ~0.5 and ~0.3. **(D)** smFRET histograms of d4G2 in 100 mM NaCl display two peaks at E<sub>0.29</sub> and E<sub>0.47</sub>. **(E)** smFRET histograms of d4G2 in 100 mM KCl display two peaks at E<sub>0.27</sub> and E<sub>0.51</sub>. The fractions of folded G-hairpin are 87.9% and 86.6% in NaCl and KCl.



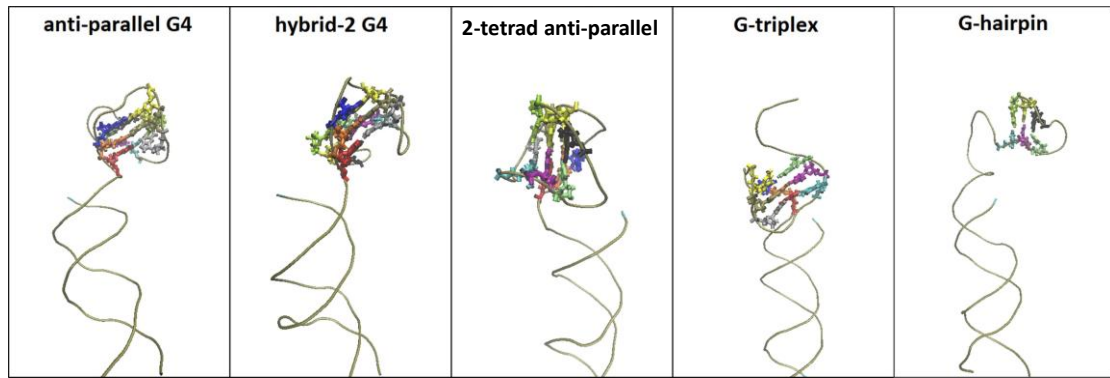

**Supplementary Figure S10. Representative structures of different G4 folding states obtained from MD simulations.** The positions of both anti-parallel and hybrid G4 tend to be at one side of duplex DNA, and the direction of G-tetrad plane is almost perpendicular to the long axis of duplex. 2-tetrad anti-parallel G4 is predominantly tilted relative to duplex, and G-tetrad plane is almost parallel to duplex. The orientation of G-triad plane in G-triplex tends to be almost perpendicular to long axis of duplex.

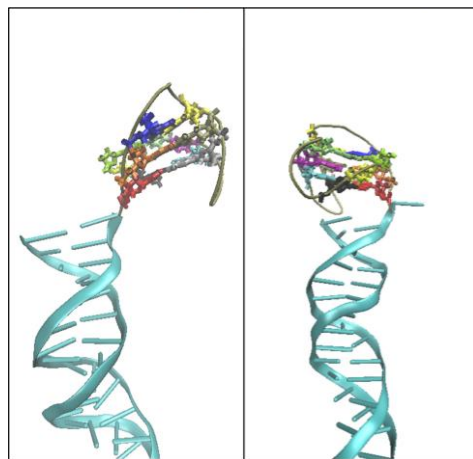

**Supplementary Figure S11. Selected hybrid-2 G4 structures at different time during simulation.** In left panel, G4 is at one side of duplex. In right panel, G4 is on the top of duplex. The first base pair of duplex is disrupted.

**A** GCGTGGCACCGGTAATAGGAAATAGGAGAGGGTTAGGGTTAGGGTTTTTTT  
 TCTCTATTCCTATCCGTCACCGC

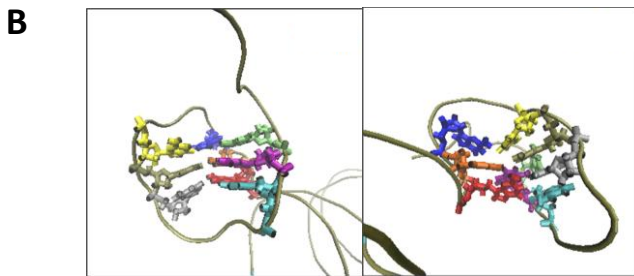

**Supplementary Figure S12. MD simulations of G-triplex in dG3 construct.** (A) DNA sequences for dG3. Relevant nucleotides of anti-parallel G4 were replaced with dTs, and energy-minimization was run for 100 ps before further MD simulations. (B) There are some subtle changes in the structure of G-triplex during simulation. For example, in left panel GGGTTAGGGTTAGGG sequence forms three layered triplex by well-organized G:G:G triad plane; at right panel G-triad plane seems deformed to some extent. Nevertheless, G-triplex structure keeps being folded without disruption.

**A** GCGTGGCACCGGTAATAGGAAATAGGAGATTTTTTTTTTTGGGGTTAGGG  
 TCTCTATTCCTATCCGTCACCGC

40 42 44 46 48 50  
 41 43 45 47 49

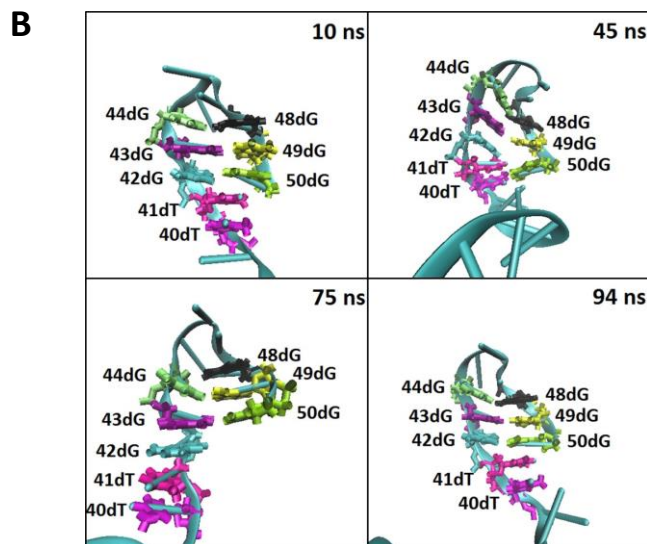

**Supplementary Figure S13. MD simulations of G-hairpin in dG2 construct.** (A) DNA sequences for dG2. Relevant nucleotides of anti-parallel G4 were replaced with dTs, and energy-minimization was run for 100 ps before further MD simulations. (B) Selected G-hairpin structures during simulation. At 10 ns and 94 ns, G-hairpins show three G-G Hoogsteen base pairs. However, G-hairpins appear to only have two G-G base pairs at 45 ns and 75 ns, and there is even one transient T-G base pair at 45 ns. Therefore, G-hairpin may have different forms based on different base pairing. However, no G-hairpins of pure G-T base pairs have been observed.

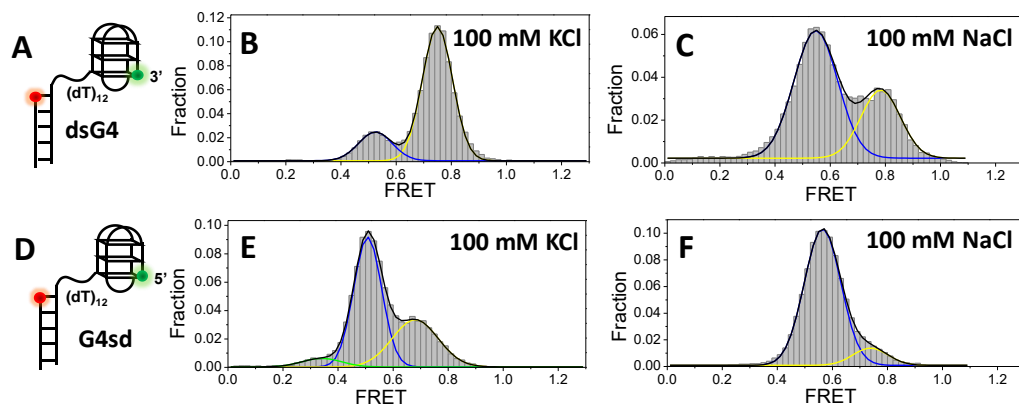

**Supplementary Figure S14. The folding of G4 linked to a partial duplex DNA. (A)** Design of G4 at the 3' end of ss/dsDNA, referred as dsG4. **(B)** In 100 mM KCl, the FRET distribution of dsG4 has two peaks at  $E_{0.53}$  and  $E_{0.75}$ . **(C)** In 100 mM NaCl, the FRET distribution of dsG4 has two peaks at  $E_{0.55}$  and  $E_{0.78}$ . **(D)** Design of G4 at the 5' end of ss/dsDNA, referred as G4sd. **(E)** In 100 mM KCl, the FRET distribution of G4sd has two major peaks at  $E_{0.51}$  and  $E_{0.68}$ , and one minor peak at  $E_{0.33}$ . **(F)** In 100 mM NaCl, the FRET distribution of G4sd has one major peak at  $E_{0.57}$  and one minor peak at  $E_{0.75}$ . Either in KCl or NaCl buffer, dsG4 prefers to fold into the conformation with higher FRET value, compared with G4sd.
